# Supplementary material for: Purkinje cell–specific deficiency in SEL1L-HRD1 endoplasmic reticulum–associated degradation causes progressive cerebellar ataxia in mice
Source: PubMed Central journal article supplement (PMC11563667; doi:10.1172/jci.insight.174725), 2024-11-08

**Figure 1G**

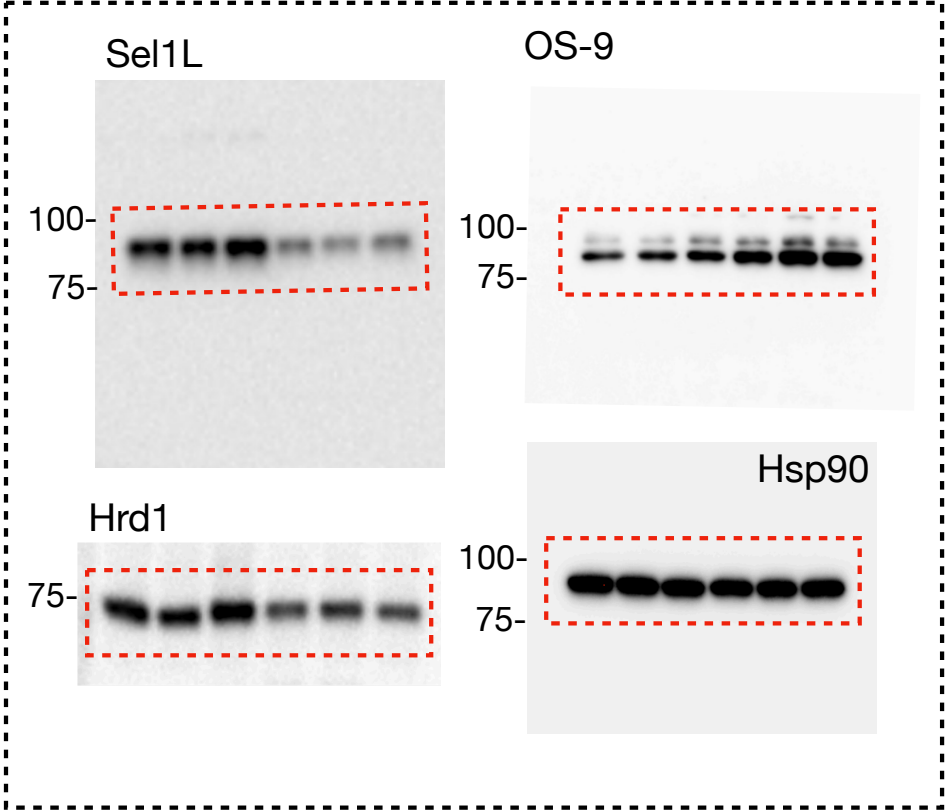

**Figure 4E**

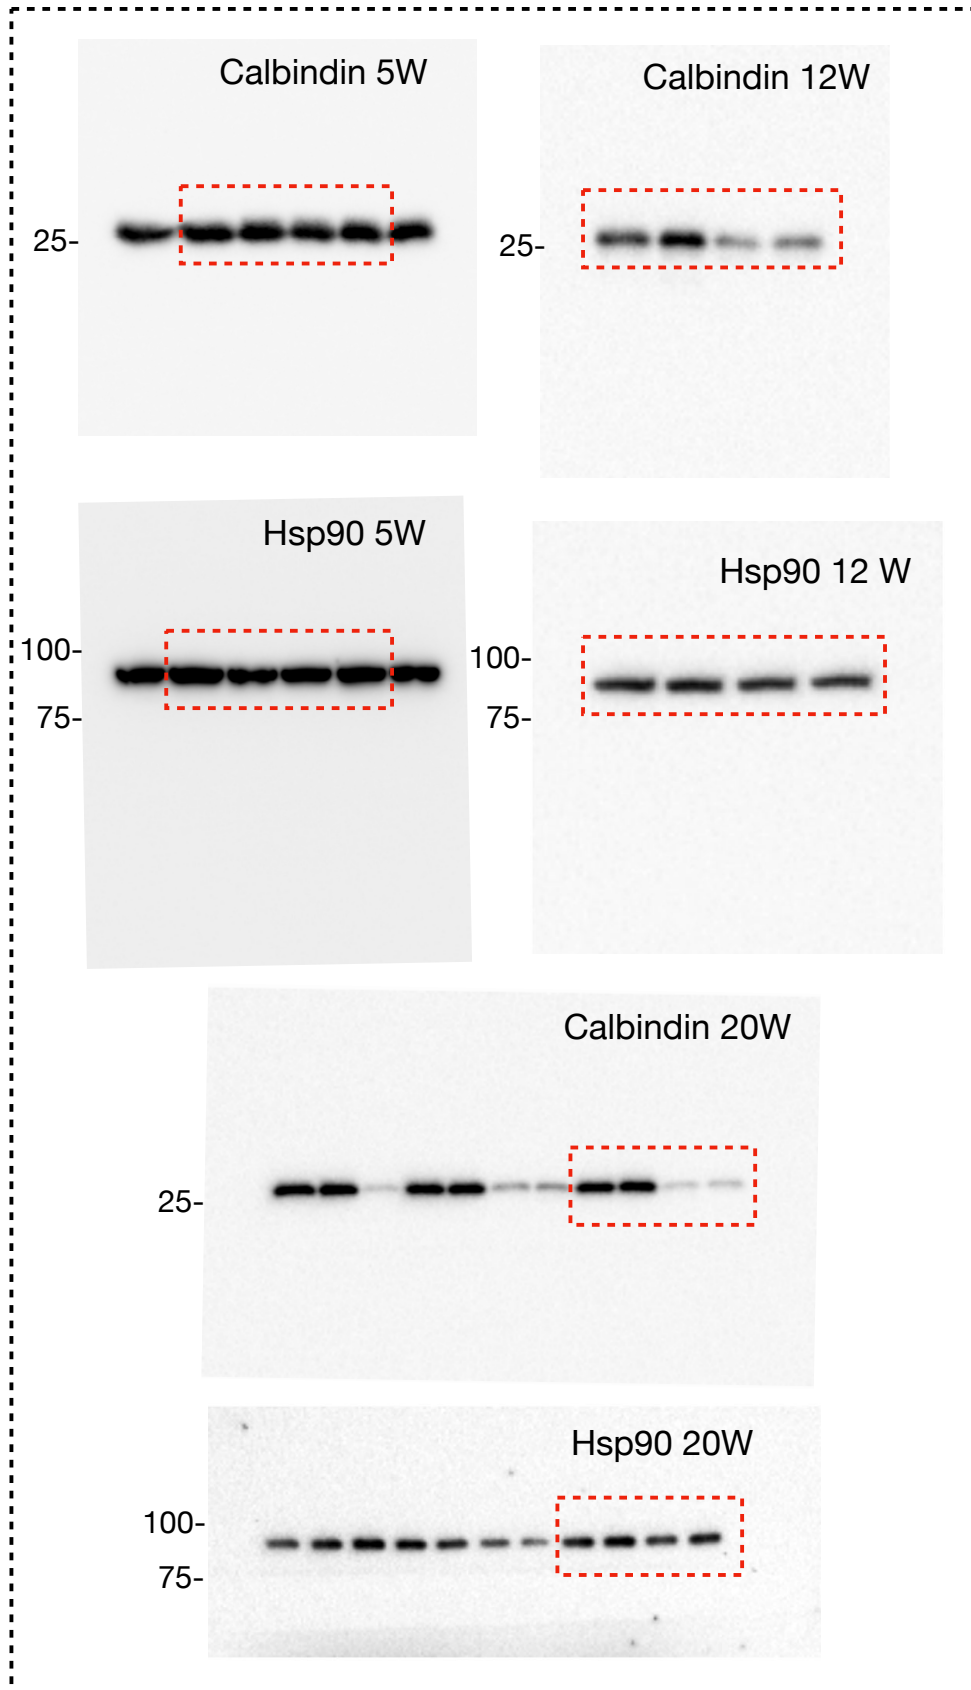

**Figure 6B**

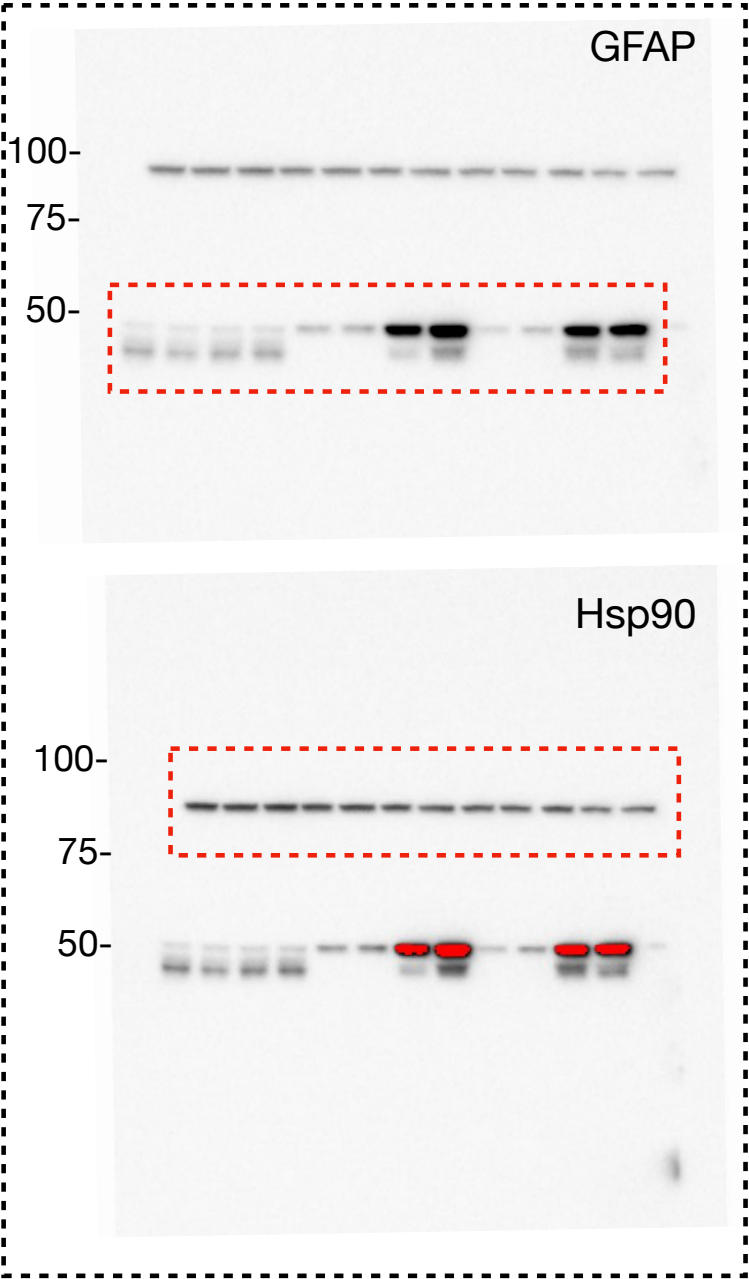

**Figure 7A**

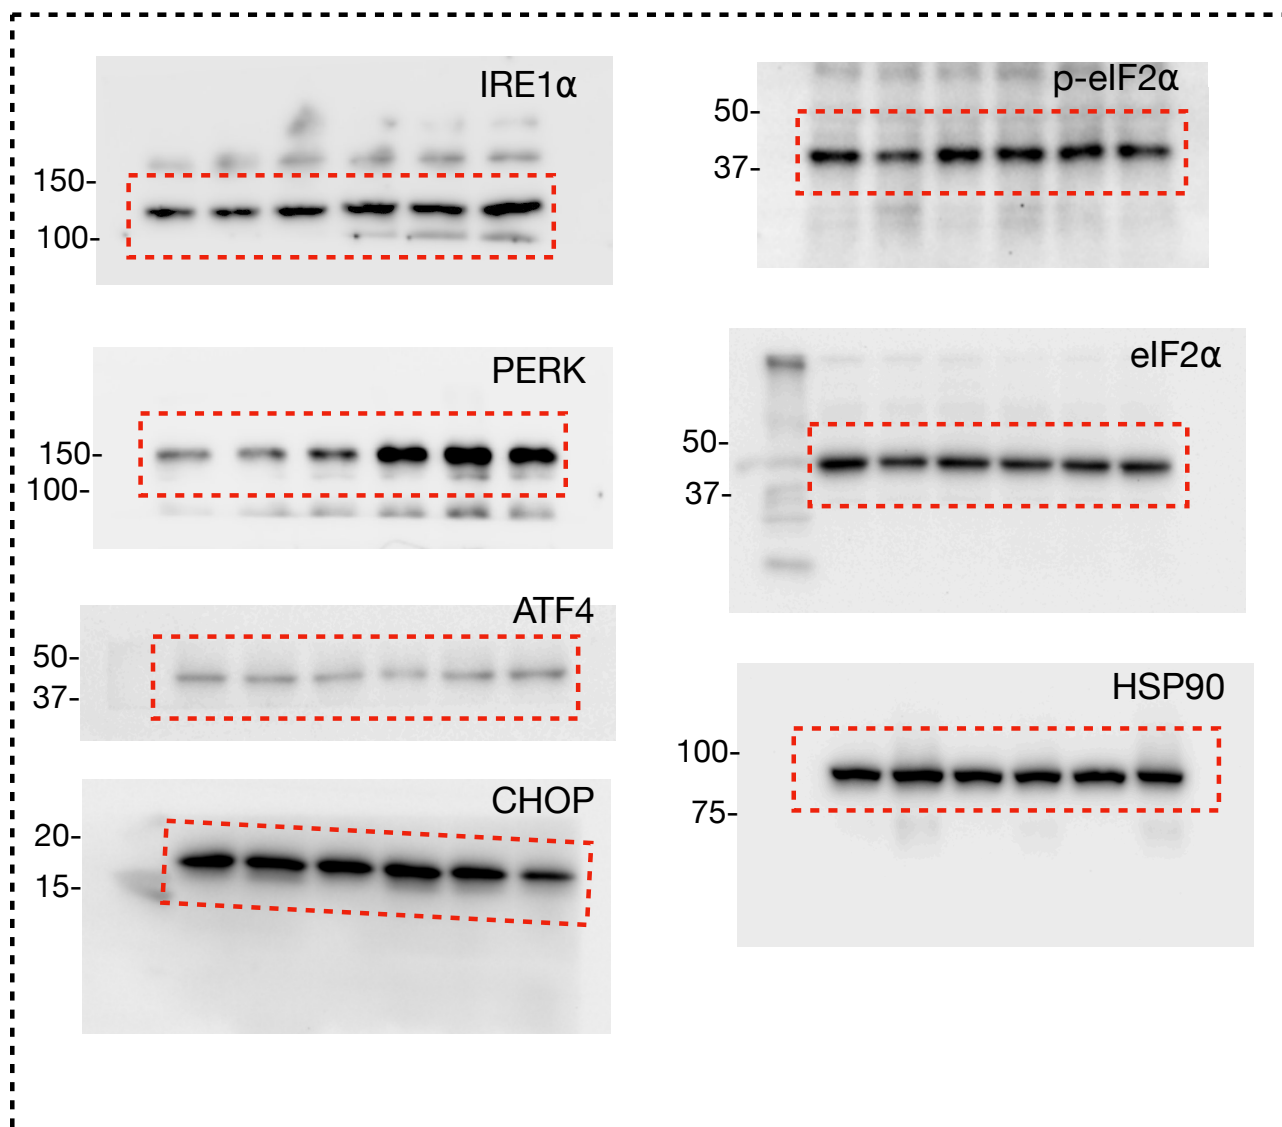

**Figure 7E**

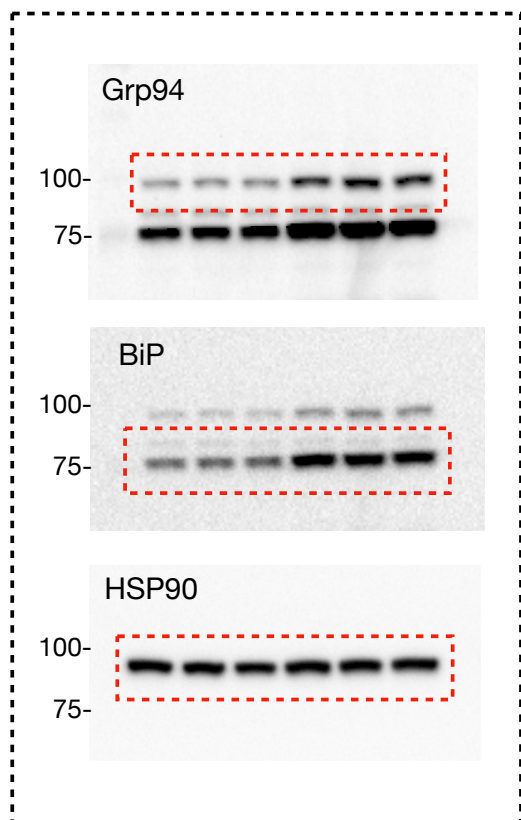

Supplement: jciinsight-9-174725-s329.pdf [file jciinsight-9-174725-s329.pdf]
